# Supplementary material for: The APE1 Asp/Asp Genotype and the Combination of APE1 Asp/Asp and hOGG1-Cys Variants Are Associated With Increased p53 Mutation in Non–Small Cell Lung Cancer
Source: PubMed Central journal article supplement (PMC3798566; doi:10.2188/jea.je20120048), 2012-11-05
Supplement: je-22-537-s001.pdf [file je-22-537-s001.pdf]

eTable 1. Observed and expected genotypic frequencies of hOGG1 and APE1 polymorphisms in control group (n=206).

| Gene         | Observed n (%) | Expected n (%) | p (HWE) |
|--------------|----------------|----------------|---------|
| <b>hOGG1</b> |                |                |         |
| Ser/Ser      | 76 (37)        | 74.6 (36)      | 0.69    |
| Ser/Cys      | 96 (47)        | 98.7 (48)      |         |
| Cys/Cys      | 34 (16)        | 32.6 (16)      |         |
| <b>APE1</b>  |                |                |         |
| Asp/Asp      | 78 (39)        | 74.6 (37)      | 0.33    |
| Asp/Glu      | 92 (43)        | 98.7 (48)      |         |
| Glu/Glu      | 36 (18)        | 32.6 (15)      |         |

HWE, Hardy–Weinberg equilibrium

eTable 2. Prevalence of hOGG1 Ser326Cys genotypes in the present participants and in studies of Asian and white populations.

| Ref. No.      | Population | No. (%)     |            |            |                   |
|---------------|------------|-------------|------------|------------|-------------------|
|               |            | Ser/Ser     | Ser/Cys    | Cys/Cys    | Ser/Cys + Cys/Cys |
| 1             | Japanese   | 16 (35.6)   | 19 (42.2)  | 10 (22.2)  | 29 (64.4)         |
| 2             | Japanese   | 85 (35.3)   | 115 (47.7) | 41 (17.0)  | 156 (64.7)        |
| 3             | Japanese   | 40 (29.0)   | 71 (51.4)  | 27 (19.6)  | 98 (71.0)         |
| 4             | Japanese   | 54 (27.3)   | 106 (53.5) | 38 (19.2)  | 144 (72.7)        |
| 5             | Japanese   | 285 (26.0)  | 544 (49.6) | 268 (24.4) | 812 (74.0)        |
| 6             | Japanese   | 117 (22.7)  | 257 (49.9) | 141 (27.4) | 398 (77.3)        |
| 7             | Japanese   | 27 (25.0)   | 55 (50.9)  | 26 (24.1)  | 81 (75.0)         |
| 8             | Korean     | 40 (20.0)   |            |            | 160 (80.0)        |
| 9             | Korean     | 46 (27.7)   | 67(40.4)   | 53(31.9)   | 120 (72.3)        |
| 10            | Chinese    | 37 (31.4)   | 61 (51.7)  | 20 (16.9)  | 81 (68.6)         |
| 11            | Chinese    | 27 (11.9)   | 132 (58.1) | 68 (30.0)  | 200 (88.1)        |
| 12            | Chinese    | 83 (18.2)   | 208 (45.7) | 164 (36.1) | 372 (81.8)        |
| 13            | Chinese    | 100 (17.2)  | 288 (49.6) | 193 (33.2) | 481 (82.8)        |
| 14            | Taiwanese  | 142 (13.0)  | 518 (47.2) | 436 (39.8) | 954 (87.0)        |
| 15            | Taiwanese  | 68 (19.0)   | 158 (44.1) | 132 (36.9) | 290 (81.0)        |
| 16            | Whites     | 68 (64.8)   | 32 (30.5)  | 5 (4.8)    | 37 (35.2)         |
| 17            | Whites     | 149(58.2)   | 93 (36.3)  | 14 (5.5)   | 107 (41.8)        |
| 18            | Whites     | 1401 (65.0) | 661 (30.7) | 93 (4.3)   | 754 (35.0)        |
| 19            | Whites     | 144 (57.4)  | 93 (37.0)  | 14 (5.6)   | 107 (42.6)        |
| 20            | Whites     | 254 (58.9)  | 155 (36.0) | 22 (5.1)   | 177 (41.1)        |
| 21            | Whites     | 182 (55.8)  | 100 (30.7) | 44 (13.5)  | 144 (44.2)        |
| 22            | Whites     | 74 (67.3)   | 33 (30.0)  | 3 (2.7)    | 36 (32.7)         |
| 23            | Whites     | 48 (54.5)   | 24 (27.3)  | 16 (18.2)  | 40 (45.5)         |
| 24            | Whites     | 101 (56.4)  | 65 (36.3)  | 13 (7.3)   | 78 (43.6)         |
| 25            | Whites     | 90 (63.8)   | 45 (31.9)  | 6 (4.3)    | 51 (36.2)         |
| Present study | Taiwanese  | 53 (24.5)   | 106 (48.8) | 58 (26.7)  | 164 (75.5)        |

## **eTable 2 references**

1. Kohno T, Shinmura K, Tosaka M, Tani M, Kim SR, Sugimura H, et al. Genetic polymorphisms and alternative splicing of the hOGG1 gene, that is involved in the repair of 8-hydroxyguanine in damaged DNA. *Oncogene*. 1998;16:3219-25.
2. Sugimura H, Kohno T, Wakai K, Nagura K, Genka K, Igarashi H, et al. hOGG1 Ser326Cys polymorphism and lung cancer susceptibility. *Cancer Epidemiol Biomarkers Prev*. 1999;8:669-74.
3. Ito H, Hamajima N, Takezaki T, Matsuo K, Tajima K, Hatooka S, et al. A limited association of OGG1 Ser326Cys polymorphism for adenocarcinoma of the lung. *J Epidemiol*. 2002;12:258-65.
4. Sunaga N, Kohno T, Yanagitani N, Sugimura H, Kunitoh H, Tamura T, et al. Contribution of the NQO1 and GSTT1 polymorphisms to lung adenocarcinoma susceptibility. *Cancer Epidemiol Biomarkers Prev*. 2002;11:730-8.
5. Kohno T, Kunitoh H, Toyama K, Yamamoto S, Kuchiba A, Saito D, et al. Association of the OGG1-Ser326Cys polymorphism with lung adenocarcinoma risk. *Cancer Sci*. 2006;97:724-8.
6. Okasaka T, Matsuo K, Suzuki T, Ito H, Hosono S, Kawase T, et al. hOGG1 Ser326Cys polymorphism and risk of lung cancer by histological type. *J Hum Genet*. 2009;54:739-45.
7. Miyaishi A, Osawa K, Osawa Y, Inoue N, Yoshida K, Kasahara M, et al. MUTYH Gln324His gene polymorphism and genetic susceptibility for lung cancer in a Japanese population. *J Exp Clin Cancer Res*. 2009;28:10-6.
8. Lee CH, Lee KY, Choe KH, Hong YC, Noh SI, Eom SY, et al. [Effects of oxidative DNA damage and genetic polymorphism of the glutathione peroxidase 1 (GPX1) and 8-oxoguanine glycosylase 1 (hOGG1) on lung cancer]. *J Prev Med Public Health*. 2006;39:130-4.
9. Cho S, Kim MJ, Choi YY, Yoo SS, Lee WK, Lee EJ, et al. Associations between polymorphisms in DNA repair genes and TP53 mutations in non-small cell lung cancer. *Lung Cancer*. 2011;73:25-31.
10. Lan Q, Mumford JL, Shen M, Demarini DM, Bonner MR, He X, et al. Oxidative damage-related genes AKR1C3 and OGG1 modulate risks for lung cancer due to exposure to PAH-rich coal combustion emissions. *Carcinogenesis*. 2004;25:2177-81.
11. Liang G, Pu Y, Yin L. Rapid detection of single nucleotide polymorphisms related with lung cancer susceptibility of Chinese population. *Cancer Lett*. 2005;223:265-74.
12. Li Z, Guan W, Li MX, Zhong ZY, Qian CY, Yang XQ, et al. Genetic polymorphism of DNA base-excision repair genes (APE1, OGG1 and XRCC1)

- and their correlation with risk of lung cancer in a Chinese population. *Arch Med Res.* 2011;42:226-34.
13. Qian B, Zhang H, Zhang L, Zhou X, Yu H, Chen K. Association of genetic polymorphisms in DNA repair pathway genes with non-small cell lung cancer risk. *Lung Cancer.* 2011;73:138-46.
  14. Chang CH, Hsiao CF, Chang GC, Tsai YH, Chen YM, Huang MS, et al. Interactive effect of cigarette smoking with human 8-oxoguanine DNA N-glycosylase 1 (hOGG1) polymorphisms on the risk of lung cancer: a case-control study in Taiwan. *Am J Epidemiol.* 2009;170:695-702.
  15. Liu CJ, Hsia TC, Tsai RY, Sun SS, Wang CH, Lin CC, et al. The joint effect of hOGG1 single nucleotide polymorphism and smoking habit on lung cancer in Taiwan. *Anticancer Res.* 2010;30:4141-5.
  16. Wikman H, Risch A, Klimek F, Schmezer P, Spiegelhalder B, Dienemann H, et al. hOGG1 polymorphism and loss of heterozygosity (LOH): significance for lung cancer susceptibility in a caucasian population. *Int J Cancer.* 2000;88:932-7.
  17. Vogel U, Nexø BA, Wallin H, Overvad K, Tjønneland A, Raaschou-Nielsen O. No association between base excision repair gene polymorphisms and risk of lung cancer. *Biochem Genet.* 2004;42:453-60.
  18. Hung RJ, Brennan P, Canzian F, Szeszenia-Dabrowska N, Zaridze D, Lissowska J, et al. Large-scale investigation of base excision repair genetic polymorphisms and lung cancer risk in a multicenter study. *J Natl Cancer Inst.* 2005;97:567-76.
  19. Loft S, Svoboda P, Kasai H, Tjønneland A, Vogel U, Møller P, et al. Prospective study of 8-oxo-7,8-dihydro-2'-deoxyguanosine excretion and the risk of lung cancer. *Carcinogenesis.* 2006;27:1245-50.
  20. Sørensen M, Raaschou-Nielsen O, Hansen RD, Tjønneland A, Overvad K, Vogel U. Interactions between the OGG1 Ser326Cys polymorphism and intake of fruit and vegetables in relation to lung cancer. *Free Radic Res.* 2006;40:885-91.
  21. Zienolddiny S, Campa D, Lind H, Ryberg D, Skaug V, Stangeland L, et al. Polymorphisms of DNA repair genes and risk of non-small cell lung cancer. *Carcinogenesis.* 2006;27:560-7.
  22. De Ruyck K, Szaumkessel M, De Rudder I, Dehoorne A, Vral A, Claes K, et al. Polymorphisms in base-excision repair and nucleotide-excision repair genes in relation to lung cancer risk. *Mutat Res.* 2007;631:101-10.
  23. Janik J, Swoboda M, Janowska B, Ciesla JM, Gackowski D, Kowalewski J, et al. 8-Oxoguanine incision activity is impaired in lung tissues of NSCLC patients with the polymorphism of OGG1 and XRCC1 genes. *Mutat Res.* 2011;709-710:21-31.
  24. Park J, Chen L, Tockman MS, Elahi A, Lazarus P. The human 8-oxoguanine DNA

N-glycosylase 1 (hOGG1) DNA repair enzyme and its association with lung cancer risk. *Pharmacogenetics*. 2004;14:103-9.

25. Hu YC, Ahrendt SA. hOGG1 Ser326Cys polymorphism and G:C-to-T:A mutations: no evidence for a role in tobacco-related non small cell lung cancer. *Int J Cancer*. 2005;114:387-93.
